# Supplementary material for: Performance enhancement of a graphene–sulfur composite as a lithium–sulfur battery electrode by coating with an ultrathin Al2O3 film via atomic layer deposition
Source: Royal Society of Chemistry journal article supplement (doi:10.1039/c4ta00234b), 2014-01-01
Supplement: c4ta00234b1.pdf [file c4ta00234b1.pdf]

## Supporting Information for

# Performance enhancement of graphene-sulfur composite in lithium-sulfur battery by coating an ultrathin Al<sub>2</sub>O<sub>3</sub> film via atomic layer deposition

Mingpeng Yu,<sup>a</sup> Wenjing Yuan,<sup>a</sup> Chun Li,<sup>a</sup> Jong-Dal Hong<sup>b</sup> and Gaoquan Shi<sup>a,\*</sup>

<sup>a</sup>*Department of Chemistry, Tsinghua University, Beijing 100084, People's Republic of China;* <sup>b</sup>*Department of Chemistry, Incheon National University, 406-772 Incheon South Korea*

### 1. Thermal atomic layer deposition (ALD) of Al<sub>2</sub>O<sub>3</sub> onto G-S composites

Al<sub>2</sub>O<sub>3</sub> ultrathin films were deposited on G-S composites by thermal atomic layer deposition (ALD, SUNALE R200, Picosun) with different ALD cycles (5 or 10). Typically, the pellets of G-S composite were placed in the ALD chamber where trimethylaluminium (Al(CH<sub>3</sub>)<sub>3</sub>, 99.9999%, Jiangsu Nata Opto-electronic Material Co. Ltd) reacted with high performance liquid chromatography (HPLC) grade H<sub>2</sub>O to form Al<sub>2</sub>O<sub>3</sub>. In this case, Al(CH<sub>3</sub>)<sub>3</sub> and H<sub>2</sub>O were acted as Al and O element sources. The operational pressure of the system was maintained at about 1800-2000 Pa throughout the deposition. Vapors of the two precursors were alternately carried by N<sub>2</sub> gas into the reaction chamber and the temperature was kept at 120°C. The total deposition time was less than 5 min and the electrode was taken out of the

chamber immediately to avoid the further sublimation of sulfur. The thickness growth of  $\text{Al}_2\text{O}_3$  layer in each ALD cycle was 1.0-2.0 Å.

## 2. Supplementary Figures

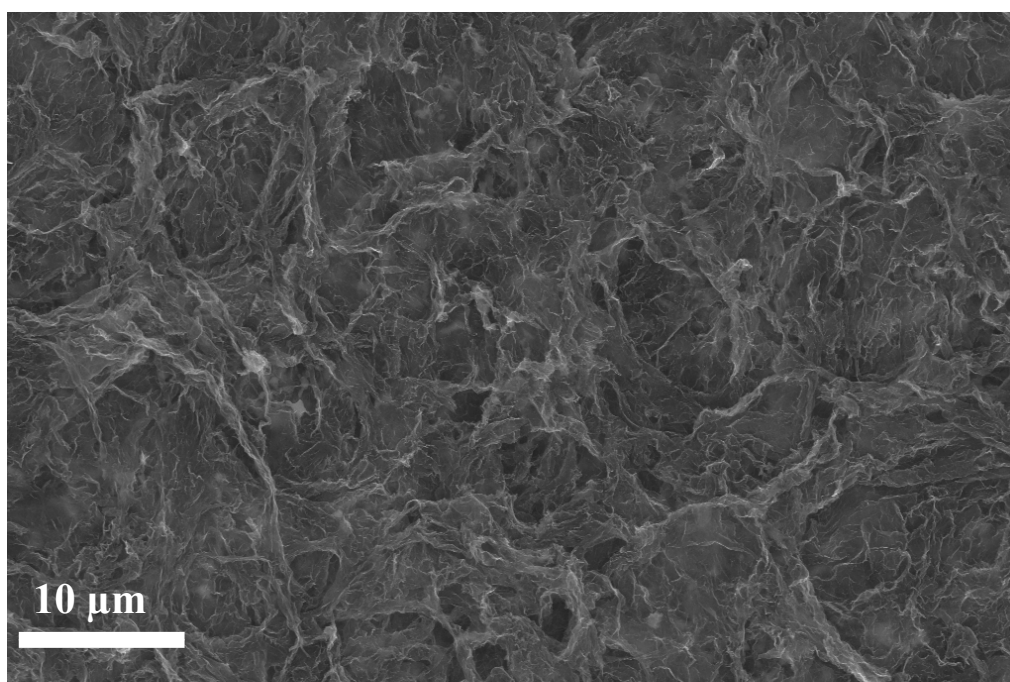

**Fig.S1** SEM image of G-S composite.

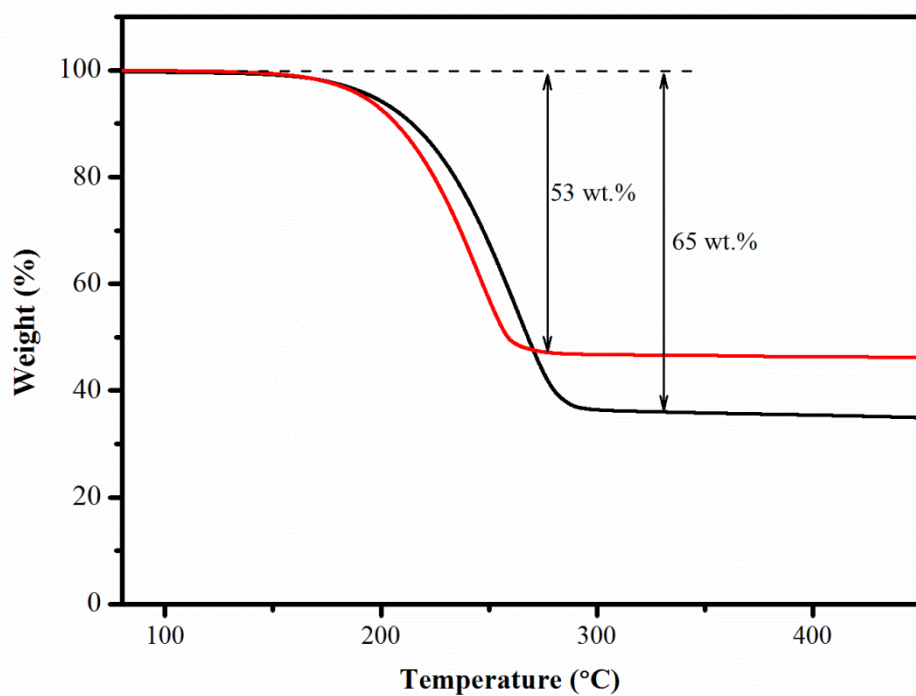

**Fig. S2** Thermogravimetric curves of the G-S composite before and after Al<sub>2</sub>O<sub>3</sub> coating for 10 ALD cycles.

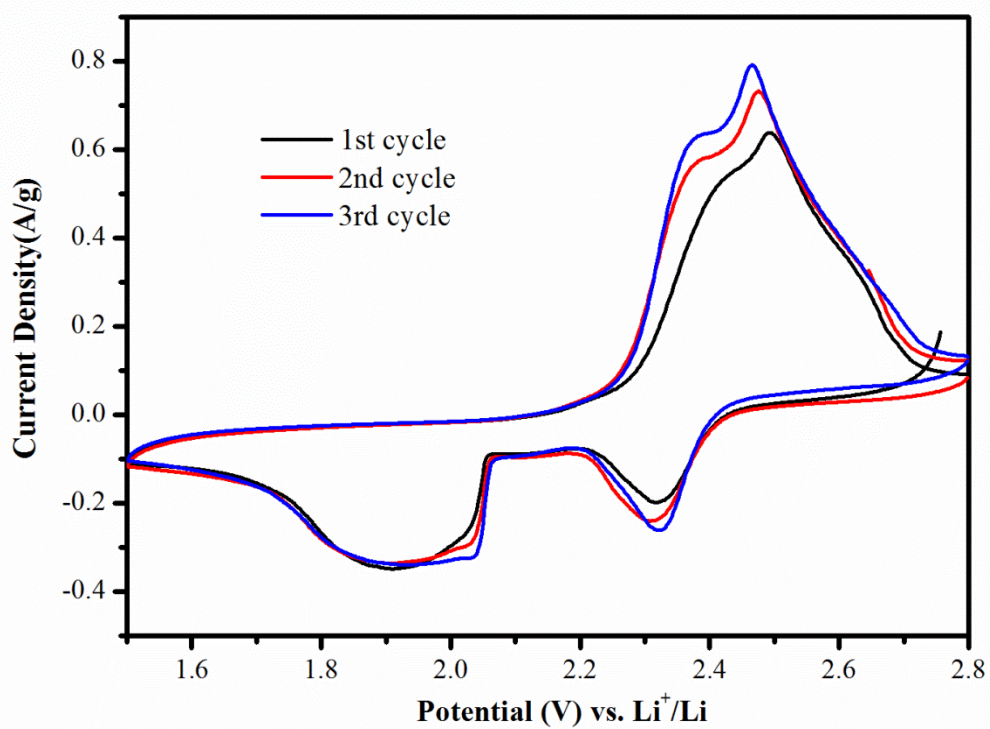

**Fig. S3** CV profiles of bare G-S composite electrode at a scan rate of  $0.1 \text{ mV s}^{-1}$ .

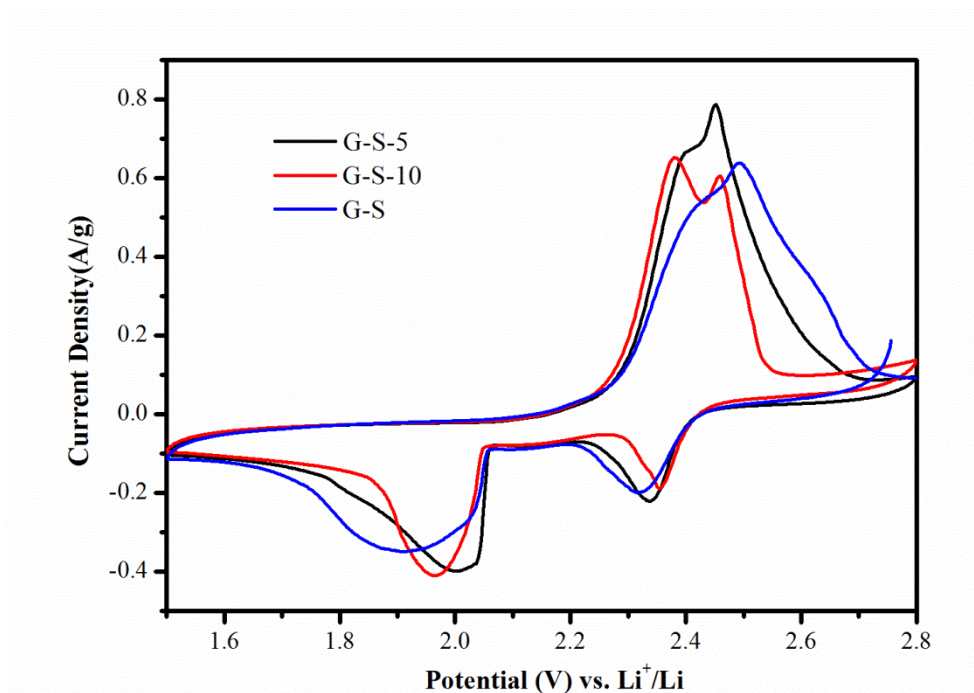

**Fig. S4** CV curves of G-S-5 and G-S-10 electrodes in comparison with that of bare G-S electrode.

Scan rate=  $0.1 \text{ mV s}^{-1}$ .

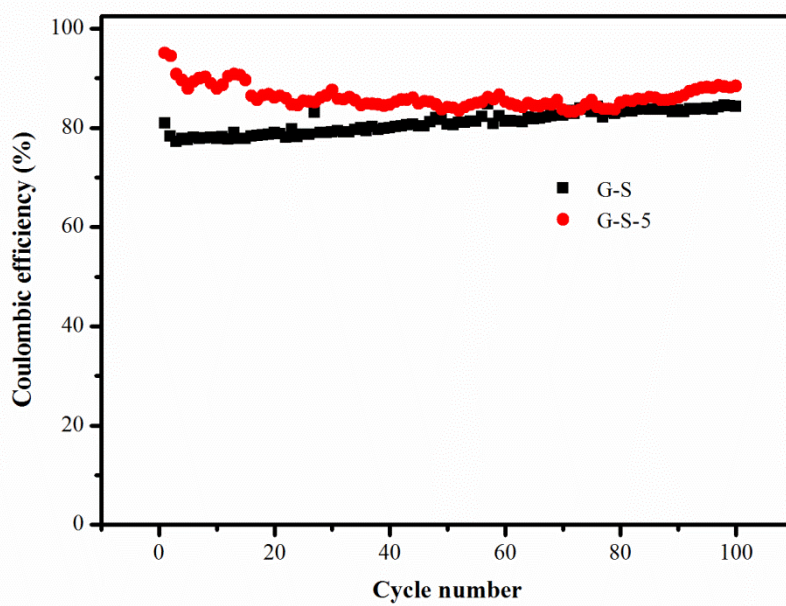

**Fig. S5** Coulombic efficiencies of the G-S and G-S-5 composite electrodes during the process of charging/discharging at 0.5 C for 100 cycles.
